# Supplementary material for: Parkinson’s disease and Alzheimer’s disease: a Mendelian randomization study
Source: BMC Med Genet. 2018 Dec 31;19(Suppl 1):215. doi: 10.1186/s12881-018-0721-7 (PMC6311900; doi:10.1186/s12881-018-0721-7)
Supplement: Supplementary file 3 — The genetic association between PD susceptibility SNPs with potential AD risk factors. (XLSX 18 kb) [file 12881_2018_721_MOESM3_ESM.xlsx]

## Sheet: Sheet1
Table S1 P Values for Associations of 43 PD-Associated Genetic Variants with 9 known AD risk factors
SNP	Years of education	Type 2 diabetes	log(Age of smoking onset)	Cigarettes per day	Major Depression Disorder	DBPa	SBPb	H91 Other hearing loss	H90 Conductive and sensorineural hearing loss
rs10797576	0.55	NA	NA	NA	0.12	NA	NA	NA	NA
rs10906923	0.69	0.59	0.41	0.22	0.66	0.92	0.3	NA	NA
rs11060180	0.32	0.77	0.37	0.22	0.82	0.5	0.77	NA	NA
rs11158026	0	NA	NA	NA	0.35	NA	NA	0.19	0.75
rs11343	0	0.84	0.39	0.98	0.46	0.39	0.18	NA	NA
rs115185635	0.79	NA	NA	NA	NA	NA	NA	NA	NA
rs11724635	0.3	0.49	0.17	0.39	0.32	0.26	0.27	0.96	0.64
rs117896735	NA	NA	NA	NA	NA	NA	NA	NA	NA
rs12456492	0.51	0.85	0.43	0.66	0.73	0.47	0.17	NA	NA
rs12497850	0.61	0.17	0.98	0.58	0.63	0.51	0.18	NA	NA
rs12637471	0.84	0.48	NA	NA	0.93	NA	NA	NA	NA
rs13294100	0.55	0.52	NA	NA	0.96	NA	NA	NA	NA
rs14235	0.3	0.05	0.5	0.03	0.27	0.82	0.49	NA	NA
rs143918452	NA	NA	NA	NA	0.1	NA	NA	NA	NA
rs1474055	0.01	NA	NA	NA	0.81	NA	NA	NA	NA
rs1555399	0.37	NA	NA	NA	0.67	NA	NA	NA	NA
rs17649553	0	0.85	0.05	0.57	NA	0.01	0	NA	NA
rs199347	0.46	0.66	0.62	0.3	0.97	0.52	0.96	NA	NA
rs2280104	0.07	0.14	0.02	0.88	0.5	0.66	0.54	0.29	0.38
rs2414739	0.42	0.94	0.99	0.65	0.78	0.58	0.1	NA	NA
rs2694528	0.38	NA	NA	NA	0.66	NA	NA	NA	NA
rs2740594	0.3	NA	NA	NA	NA	NA	NA	NA	NA
rs329648	0.32	0.52	0.43	0.06	0	0.39	0.33	NA	NA
rs34043159	0.73	NA	NA	NA	0.77	NA	NA	NA	NA
rs34311866	0.41	NA	NA	NA	0.92	NA	NA	NA	NA
rs353116	0.15	0.88	0.14	0.43	0.29	0.13	0.11	NA	NA
rs356182	0.87	NA	NA	NA	NA	NA	NA	NA	NA
rs35749011	0.19	NA	NA	NA	NA	NA	NA	NA	NA
rs3793947	0.6	NA	NA	NA	0.03	NA	NA	NA	NA
rs4073221	0.24	NA	NA	NA	0.83	NA	NA	NA	NA
rs4653767	0.02	NA	NA	NA	0.89	NA	NA	NA	NA
rs4784227	0.01	0.02	0.97	0.69	0.15	0.57	0.65	0.4	0.64
rs591323	0.17	0.1	0.39	0.91	0.44	0.27	0.26	NA	NA
rs62120679	0.9	NA	NA	NA	0.06	NA	NA	NA	NA
rs6430538	0.39	0.19	0.52	0.29	0.4	0.14	0.04	0.31	0.1
rs6812193	0.37	0.72	0.95	0.92	0.64	0.07	0.96	0.33	0.07
rs76904798	0.52	NA	NA	NA	0.31	NA	NA	NA	NA
rs78738012	0.75	NA	NA	NA	NA	NA	NA	NA	NA
rs8005172	0.77	NA	NA	NA	0.63	NA	NA	NA	NA
rs8118008	0.77	NA	NA	NA	0.53	NA	NA	NA	NA
rs823118	0.63	NA	NA	NA	0.21	NA	NA	NA	NA
rs9275326	0.49	NA	NA	NA	0.12	NA	NA	NA	NA
rs9468199	0.79	0.7	NA	NA	0.01	NA	NA	NA	NA
NA, not available.
adiastolic blood pressure.
bsystolic blood pressure.

## Sheet: Sheet2
Table S2 P Values for Associations of 43 PD-Associated Genetic Variants with dietary factors
SNP	Fish oil including	Glucosamine	Calcium	Zinc	Iron	Selenium	Vitamin A	Vitamin B	Vitamin C	Vitamin D	Vitamin E	Folic acid or Folate (Vit B9)	Multivitamins +/- minerals
	cod liver oil
rs12456492	0.14	0.05	0.98	0.57	0.31	0.21	0.19	0.5	0.96	0.19	0.8	0.79	0.3
rs199347	0.03	0.93	0.17	0.51	0.03	0.24	0.3	0.17	0.05	0.05	0.43	0.3	0.93
rs356182	0.46	0.29	0.13	0.13	0.71	0.59	0.45	0.59	0.21	0.45	0.55	0.82	0.9
rs11724635	0.19	0.16	0.69	0.54	0.08	0.23	0.6	0.63	0.59	0.99	0.91	0.15	0.05
rs8005172	0.5	0.04	0.86	0.59	0.67	0.17	0.23	0.14	0.34	0.85	0.63	0.5	0.98
rs353116	0.18	0.84	0.04	0.03	0.45	0.19	0.25	0.96	0.68	0.78	0.76	0.14	0.18
rs143918452	0.79	0.14	0.87	0.21	0.36	0.43	0.47	0.3	0.14	0.76	0.87	0.38	0.83
rs34043159	0.14	0.08	0.32	0.39	0.48	0.17	0.66	0.52	0.38	0.46	0.32	0.31	0.74
rs9468199	0.35	0.28	0.86	0.36	0.43	0.8	0.15	0.94	0.66	0.31	0.82	0.76	0.7
rs329648	0.23	0.26	0.93	0.69	0.97	0.68	0.47	0.17	0.59	0.87	0.91	0.99	1
rs4073221	0.89	0.7	0.68	0.59	0.79	0.49	0.75	0.65	0.52	0.69	0.81	0.52	0.23
rs2694528	0.85	0.77	0.47	0.45	0.03	0.53	0.17	0.48	0.36	0.39	0.73	0.97	0.97
rs76904798	0.29	0.88	0.39	0.16	0.85	0.46	0.19	0.19	0.07	0.61	0.06	0.72	0.88
rs11060180	0.27	0.73	0.07	0.87	0.23	0.75	0.16	0.38	0.68	0.38	0.58	0.34	0.96
rs823118	0.06	0.33	0.2	0.77	0.29	0.13	0.43	0.26	0.36	0.81	0.52	0.77	0
rs10797576	0.01	0.59	0.46	0.82	0.03	0.27	0.36	0.59	0.74	0.14	0.18	0.17	0.58
rs6812193	0.27	0.5	0.8	0.42	0.23	0.93	0.06	0.78	0.49	0.76	0.73	0.19	0.57
rs1555399	0.22	0.01	0.95	0.32	0.74	0.19	0.97	0.96	0.97	0.9	0.25	0.26	0.46
rs4784227	0.77	0.79	0.06	0.24	0.21	0.82	0.17	0.56	0.69	0.29	0.24	0.44	0.24
rs6430538	0.33	0.98	0.56	0.52	0.85	0.18	0.72	0.39	0.87	0.67	0.63	0.08	0.21
rs34311866	0.23	0.12	0.92	0.59	0.26	0.53	0.95	0.6	0.2	0.72	0.15	0.92	0.56
rs2414739	0.05	0.9	0.57	0.11	0.08	0.4	0.68	0.39	0.43	0.51	0.6	0.3	0.6
rs12637471	0.71	0.04	0.25	0.41	0.92	0.08	0.88	0.8	1	0.99	0.5	0.47	0.55
rs2280104	0.2	0.58	0.61	0.76	0.28	0.45	0.71	0.85	0.62	0.25	0.23	0.69	0.5
rs13294100	0.48	0.06	0.09	0.72	0.45	0.19	0.13	0.27	0.82	0.97	0.5	0.16	0.25
rs117896735	0.87	0.45	0.98	0.75	0.6	0.68	0.54	0.02	0.26	0.64	0.08	0.09	0.83
rs17649553	0.69	0.54	0.26	0.01	0.05	0.5	0.25	0.13	0	0.66	0.24	0.49	0.01
rs115185635	0.38	0.98	0.52	0.93	0.78	0.93	0.33	0.34	0.3	0.02	0.76	0.45	0.56
rs1474055	0.51	0.21	0.97	0.42	0.93	0.16	0.61	0.38	0.31	0.18	0.87	0.44	0.6
rs3793947	0.66	0.43	0.87	0.22	0.01	0.14	0.79	0.86	0.52	0.51	0.74	0.11	0.16
rs62120679	0.45	0.46	0.73	0.48	0.25	0.13	0.75	0.51	0.74	0.8	0.87	0.12	0.47
rs35749011	0.86	0.62	0.22	0.34	0.34	0.15	0.48	0.8	0.63	0.47	0.69	0.41	0.82
rs4653767	0.23	0.33	0.58	0.29	0.73	0.01	0.71	0.19	0.18	0.68	0.5	0.12	0.46
rs2740594	0.06	0.13	0.79	0.63	0.18	0.19	0.21	0.71	0.46	0.71	0.18	0.37	0.33
rs12497850	0.55	0.91	0.37	0.06	0.23	0.5	0.19	0.93	0.28	0.78	0.66	0.61	0.37
rs78738012	0.05	0.57	0.29	0.65	0.07	0.61	0.03	0.16	0.06	0.36	0.38	0.1	0.87
rs591323	0.48	0.86	0.94	0.02	0.88	0.23	0.99	0.1	0.96	0.15	0.82	0.48	0.18
rs11158026	0.02	0.01	0.55	0.18	0.67	0.83	0.75	0.32	0.02	0.58	0.75	0.46	0.87
rs10906923	0.09	0.75	0.19	0.86	0.02	0.26	0.14	0.04	0.07	0.32	0.04	0.41	0.16
rs9275326	0.63	0.7	0	0.05	0.33	0.12	0.95	0.12	0	0.59	0.38	0	0
rs11343	0.11	0.09	0.84	0.16	0.68	0.18	0.59	0.35	0.13	0.37	0.82	0.3	0.58
rs14235	0.26	0.56	0.45	0.65	0.14	0.08	0.69	0.59	0.91	0.03	0.88	0.01	0.42
rs9468199	0.79	0.7	NA	NA	0.01	0.79	0.79	0.7	NA	NA	0.01	0.79	NA
NA, not available

## Sheet: Sheet3
Table S3 P Values for Associations of 43 PD-Associated Genetic Variants with alcohol and AD biomarkers
SNP	Aβ42	ptau	tau	SNP	continuous alcohol	dichotomous alcohol
rs10797576	0.51	0.93	0.31	rs10797576	0.43	0.08
rs10906923	0.13	0.76	0.91	rs6430538	0.14	0.55
rs11060180	0.81	0.02	0	rs353116	0.98	0.26
rs11158026	0.34	0.94	0.9	rs12497850	0.32	0.51
rs11343	0.45	0.13	0.23	rs11724635	0.74	0.63
rs11724635	0.13	0.05	0.21	rs6812193	0.21	0.63
rs12456492	0.24	0.93	0.57	rs199347	0.58	0.54
rs12497850	0.75	0.32	0.36	rs591323	0.16	0.73
rs12637471	0.57	0.53	0.53	rs2280104	0.83	0.95
rs13294100	NA	0.56	NA	rs10906923	0.88	0.29
rs14235	0.15	0.83	0.59	rs329648	0.9	0.65
rs1474055	0.08	0.5	0.53	rs11060180	0.86	0.94
rs1555399	0.22	0.97	0.04	rs2414739	0.1	0.5
rs199347	0.26	0.14	0.24	rs11343	0.96	0.6
rs2280104	0.33	0.51	0.69	rs14235	0.24	0.3
rs2414739	0.71	0.69	0.94	rs4784227	0.02	0.45
rs2694528	0	0.03	0.19	rs17649553	0	0.29
rs2740594	0.67	0.16	0.44	rs12456492	0.29	0.35
rs329648	0.62	0.34	0.45
rs34043159	0.43	0.23	0.11
rs34311866	0.48	0.63	0.6
rs353116	0.24	0.39	0.42
rs4073221	0.58	0.73	0.7
rs4653767	0.97	0.26	0.25
rs4784227	0.71	0.47	0.16
rs591323	0.08	0.66	0.32
rs6430538	0.68	0.03	0.14
rs6812193	0.32	0.68	0.68
rs76904798	0.23	0.61	0.66
rs8005172	0.65	0.75	0.51
rs8118008	0.79	0.59	0.17
rs823118	0.33	0.62	0.26
rs9468199	0.4	0.7	0.37
NA, not available.
